# Supplementary material
Source: Springer Nature journal article supplement (https://www.springermedizin.de/resource/supplementary/12883_2013_962_MOESM4_ESM.pdf/9456522)

**A**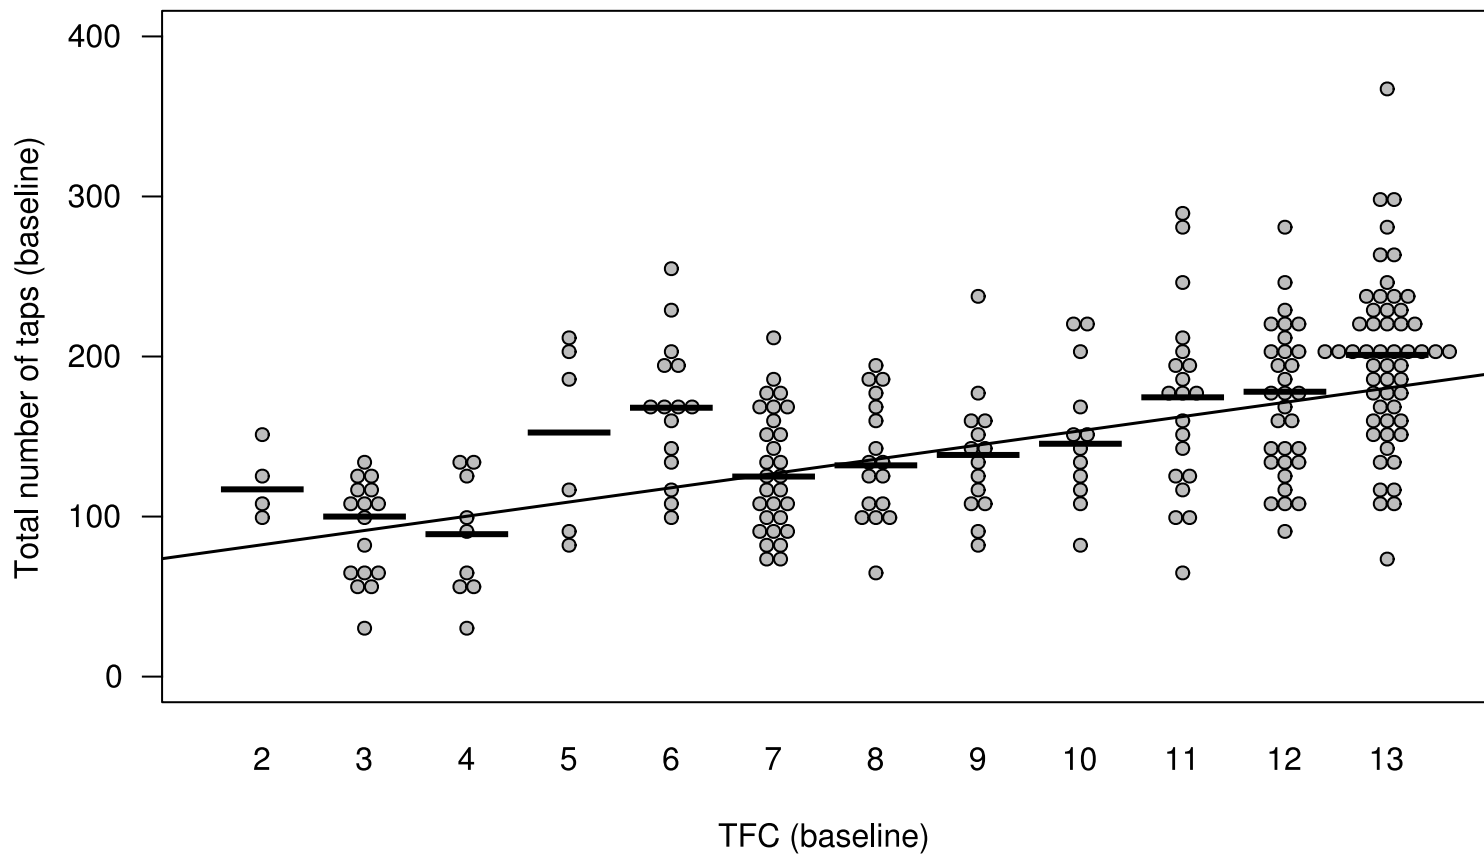**B**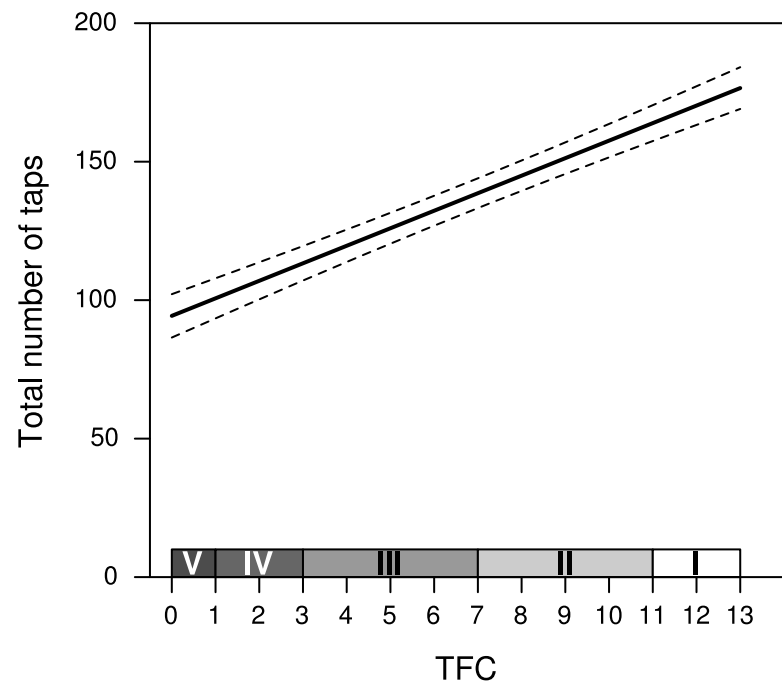**C**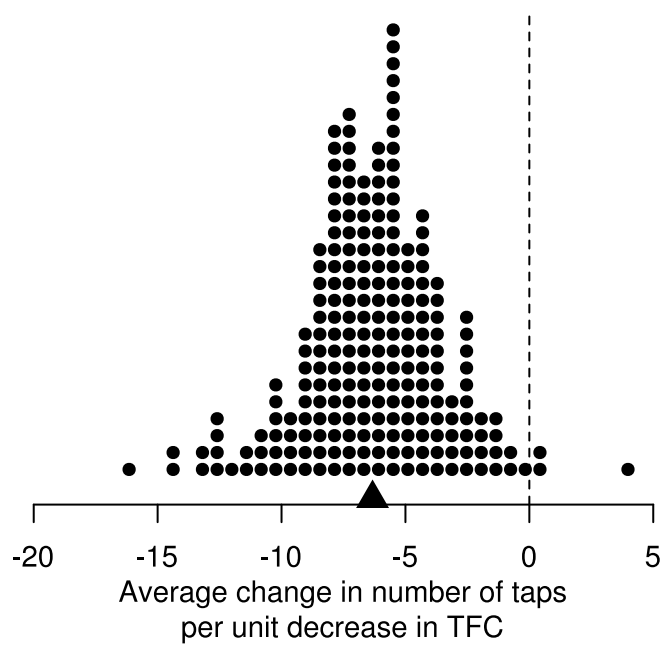

Supplement: MOESM4 [file 9456522]
